# Supplementary material for: #MaskOn! #MaskOff! Digital polarization of mask-wearing in the United States during COVID-19
Source: PubMed Central journal article supplement (PMC8081244; doi:10.1371/journal.pone.0250817), 2021-04-28

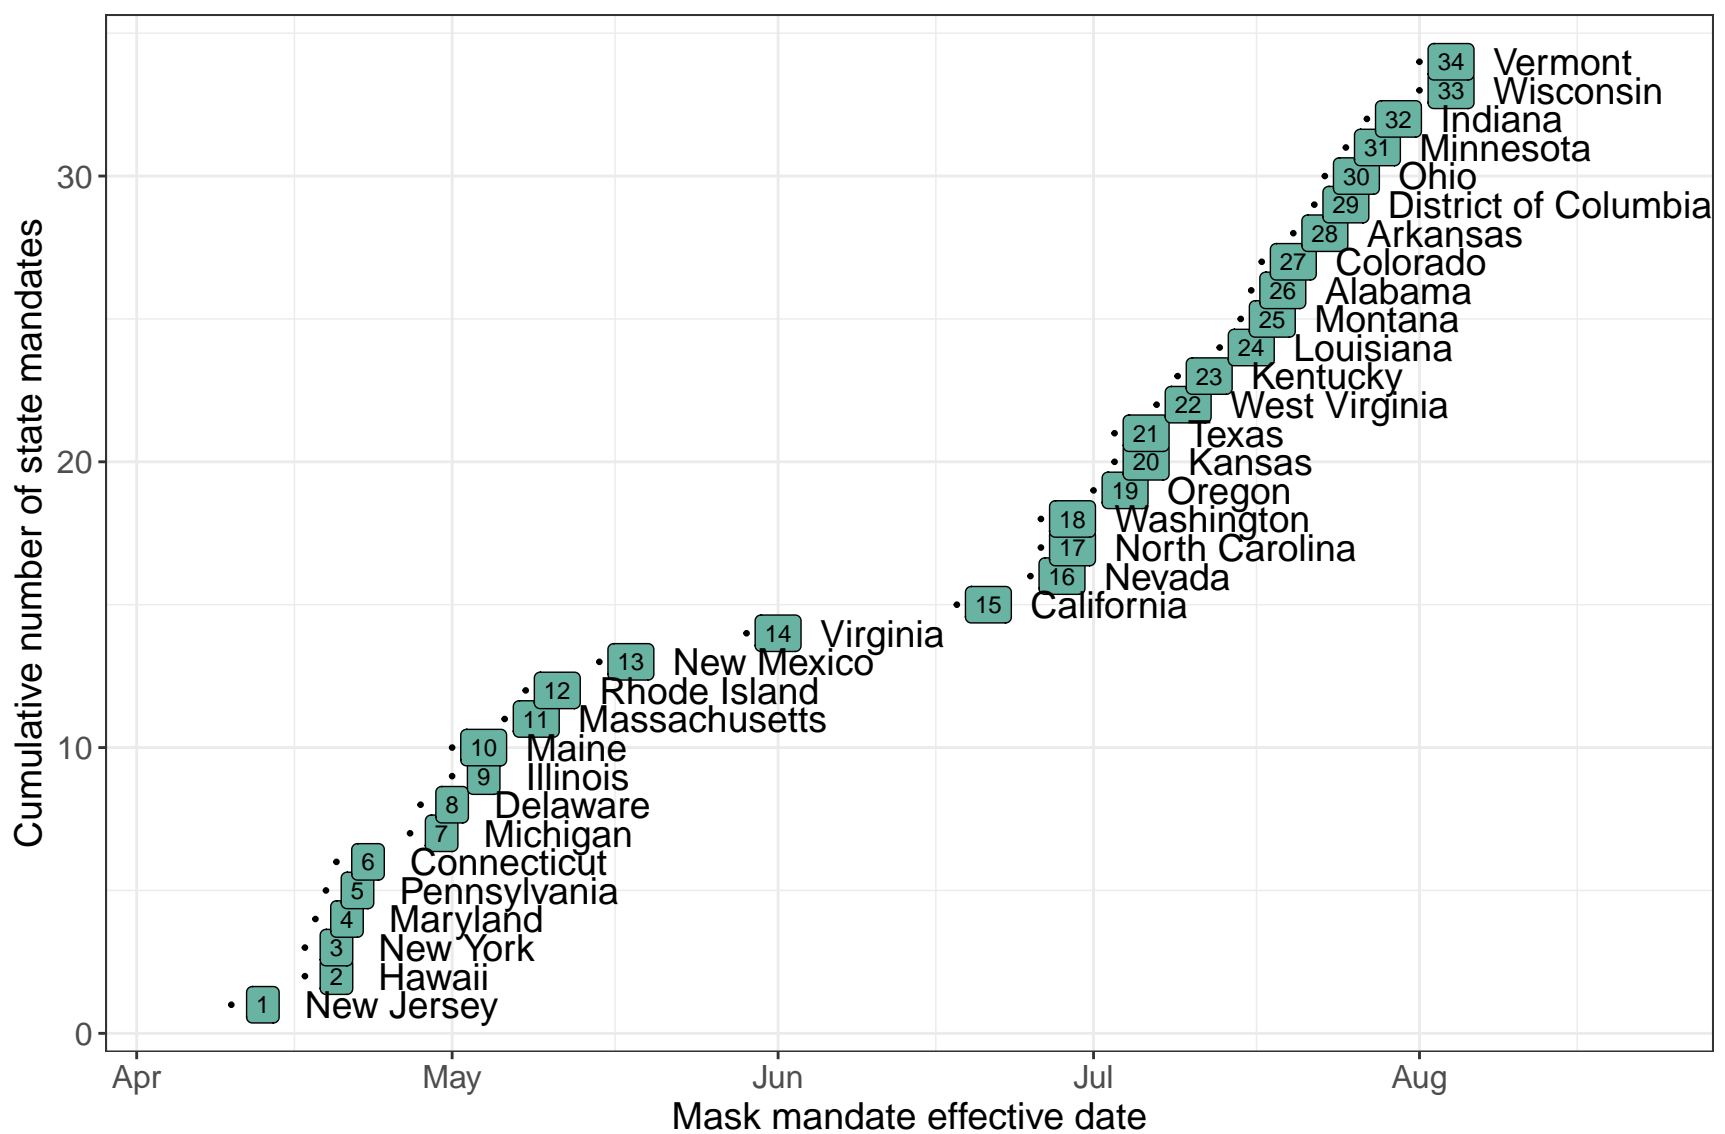

Supplement: pone.0250817.s002.pdf [file pone.0250817.s002.pdf]
