# Supplementary material for: #MaskOn! #MaskOff! Digital polarization of mask-wearing in the United States during COVID-19
Source: PubMed Central journal article supplement (PMC8081244; doi:10.1371/journal.pone.0250817), 2021-04-28
Supplement: pone.0250817.s004.pdf [file pone.0250817.s004.pdf]

**S1 Table.** Chi-square test results of independence for six trending issues and baseline (data from Knight Foundation 2019)

| Issues                | Segment  | Percent | Chi-square | df | p-value |
|-----------------------|----------|---------|------------|----|---------|
| Baseline              | Extreme  | 35      |            |    |         |
|                       | Moderate | 65      |            |    |         |
| Hurricane             | Extreme  | 18.5    | 6.702      | 1  | 0.010*  |
|                       | Moderate | 81.5    |            |    |         |
| North Korea           | Extreme  | 22      | 4.147      | 1  | 0.042*  |
|                       | Moderate | 78      |            |    |         |
| Mueller Investigation | Extreme  | 34      | 0.089      | 1  | 0.765   |
|                       | Moderate | 66      |            |    |         |
| Sexual Harassment     | Extreme  | 26      | 1.911      | 1  | 0.167   |
|                       | Moderate | 74      |            |    |         |
| White nationalism     | Extreme  | 20      | 5.643      | 1  | 0.018*  |
|                       | Moderate | 80      |            |    |         |
| Mass shootings        | Extreme  | 30      | 0.570      | 1  | 0.450   |
|                       | Moderate | 70      |            |    |         |

\* $p < 0.05$ . Extreme: Extreme Left and Extreme Right; Moderate: Center Left and Center Right

## References

Freelon, Deen. (2019). Tweeting left, right, & center: How users and attention are distributed across Twitter. The John S. and James L. Knight Foundation.
