# Supplementary material for: #MaskOn! #MaskOff! Digital polarization of mask-wearing in the United States during COVID-19
Source: PubMed Central journal article supplement (PMC8081244; doi:10.1371/journal.pone.0250817), 2021-04-28
Supplement: pone.0250817.s005.pdf [file pone.0250817.s005.pdf]

**S2 Table.** Statewide mask mandates (DC included) and effective dates between March and August 2020

| State          | Effective Date | Order Link                                                                                                                                                                                                                                                                                                                                                                                            |
|----------------|----------------|-------------------------------------------------------------------------------------------------------------------------------------------------------------------------------------------------------------------------------------------------------------------------------------------------------------------------------------------------------------------------------------------------------|
| New Jersey     | 4/10           | <a href="https://nj.gov/infobank/eo/056murphy/pdf/EO-122.pdf">https://nj.gov/infobank/eo/056murphy/pdf/EO-122.pdf</a>                                                                                                                                                                                                                                                                                 |
| Hawaii         | 4/17           | <a href="https://governor.hawaii.gov/wp-content/uploads/2020/04/2004088-ATG_Fifth-Supplementary-Proclamation-for-COVID-19-distribution-signed.pdf">https://governor.hawaii.gov/wp-content/uploads/2020/04/2004088-ATG_Fifth-Supplementary-Proclamation-for-COVID-19-distribution-signed.pdf</a>                                                                                                       |
| New York       | 4/17           | <a href="https://www.governor.ny.gov/news/no-20218-continuing-temporary-suspension-and-modification-laws-relating-disaster-emergency">https://www.governor.ny.gov/news/no-20218-continuing-temporary-suspension-and-modification-laws-relating-disaster-emergency</a>                                                                                                                                 |
| Maryland       | 4/18           | <a href="https://governor.maryland.gov/wp-content/uploads/2020/04/Masks-and-Physical-Distancing-4.15.20.pdf">https://governor.maryland.gov/wp-content/uploads/2020/04/Masks-and-Physical-Distancing-4.15.20.pdf</a>                                                                                                                                                                                   |
| Pennsylvania   | 4/19           | <a href="https://www.governor.pa.gov/wp-content/uploads/2020/04/20200415-SOH-worker-safety-order.pdf">https://www.governor.pa.gov/wp-content/uploads/2020/04/20200415-SOH-worker-safety-order.pdf</a>                                                                                                                                                                                                 |
| Connecticut    | 4/20           | <a href="https://portal.ct.gov/-/media/Office-of-the-Governor/Executive-Orders/Lamont-Executive-Orders/Executive-Order-No-7BB.pdf?la=en">https://portal.ct.gov/-/media/Office-of-the-Governor/Executive-Orders/Lamont-Executive-Orders/Executive-Order-No-7BB.pdf?la=en</a>                                                                                                                           |
| Michigan       | 4/27           | <a href="https://content.govdelivery.com/attachments/MIEOG/2020/04/24/file_attachments/1435194/EO%202020-59.pdf">https://content.govdelivery.com/attachments/MIEOG/2020/04/24/file_attachments/1435194/EO%202020-59.pdf</a>                                                                                                                                                                           |
| Delaware       | 4/28           | <a href="https://governor.delaware.gov/health-soe/thirteenth-state-of-emergency/">https://governor.delaware.gov/health-soe/thirteenth-state-of-emergency/</a>                                                                                                                                                                                                                                         |
| Illinois       | 5/1            | <a href="https://www2.illinois.gov/Pages/Executive-Orders/ExecutiveOrder2020-32.aspx">https://www2.illinois.gov/Pages/Executive-Orders/ExecutiveOrder2020-32.aspx</a>                                                                                                                                                                                                                                 |
| Maine          | 5/1            | <a href="https://www.maine.gov/governor/mills/sites/maine.gov/governor.mills/files/inline-files/An%20Order%20to%20Stay%20Safer%20at%20Home.pdf">https://www.maine.gov/governor/mills/sites/maine.gov/governor.mills/files/inline-files/An%20Order%20to%20Stay%20Safer%20at%20Home.pdf</a>                                                                                                             |
| Massachusetts  | 5/6            | <a href="https://www.mass.gov/doc/may-1-2020-masks-and-face-coverings/download">https://www.mass.gov/doc/may-1-2020-masks-and-face-coverings/download</a>                                                                                                                                                                                                                                             |
| Rhode Island   | 5/8            | <a href="https://governor.ri.gov/documents/orders/Executive-Order-20-30.pdf">https://governor.ri.gov/documents/orders/Executive-Order-20-30.pdf</a>                                                                                                                                                                                                                                                   |
| New Mexico     | 5/15           | <a href="https://cv.nmhealth.org/wp-content/uploads/2020/05/5-15-2020-PHO.pdf">https://cv.nmhealth.org/wp-content/uploads/2020/05/5-15-2020-PHO.pdf</a>                                                                                                                                                                                                                                               |
| Virginia       | 5/29           | <a href="https://www.governor.virginia.gov/media/governorviriniagov/executive-actions/EO-63-and-Order-Of-Public-Health-Emergency-Five---Requirement-To-Wear-Face-Covering-While-Inside-Buildings.pdf">https://www.governor.virginia.gov/media/governorviriniagov/executive-actions/EO-63-and-Order-Of-Public-Health-Emergency-Five---Requirement-To-Wear-Face-Covering-While-Inside-Buildings.pdf</a> |
| California     | 6/18           | <a href="https://www.cdph.ca.gov/Programs/CID/DCDC/CDPH%20Document%20Library/COVID-19/Guidance-for-Face-Coverings_06-18-2020.pdf">https://www.cdph.ca.gov/Programs/CID/DCDC/CDPH%20Document%20Library/COVID-19/Guidance-for-Face-Coverings_06-18-2020.pdf</a>                                                                                                                                         |
| Nevada         | 6/25           | <a href="https://nvhealthresponse.nv.gov/wp-content/uploads/2020/06/Directive-024-Face-Coverings.pdf">https://nvhealthresponse.nv.gov/wp-content/uploads/2020/06/Directive-024-Face-Coverings.pdf</a>                                                                                                                                                                                                 |
| North Carolina | 6/26           | <a href="https://files.nc.gov/governor/documents/files/EO147-Phase-2-Extension.pdf">https://files.nc.gov/governor/documents/files/EO147-Phase-2-Extension.pdf</a>                                                                                                                                                                                                                                     |
| Washington     | 6/26           | <a href="https://coronavirus.wa.gov/information-for-you-and-your-family/face-masks-or-cloth-face-covering">https://coronavirus.wa.gov/information-for-you-and-your-family/face-masks-or-cloth-face-covering</a>                                                                                                                                                                                       |
| Oregon         | 7/1            | <a href="https://sharedsystems.dhsoha.state.or.us/DHSForms/Served/1e2288K.pdf">https://sharedsystems.dhsoha.state.or.us/DHSForms/Served/1e2288K.pdf</a>                                                                                                                                                                                                                                               |
| Kansas         | 7/3            | <a href="https://governor.kansas.gov/wp-content/uploads/2020/07/20200702093130003.pdf">https://governor.kansas.gov/wp-content/uploads/2020/07/20200702093130003.pdf</a>                                                                                                                                                                                                                               |
| Texas          | 7/3            | <a href="https://open.texas.gov/uploads/files/organization/opentexas/EO-GA-29-use-of-face-coverings-during-COVID-19-IMAGE-07-02-2020.pdf">https://open.texas.gov/uploads/files/organization/opentexas/EO-GA-29-use-of-face-coverings-during-COVID-19-IMAGE-07-02-2020.pdf</a>                                                                                                                         |
| West Virginia  | 7/7            | <a href="https://governor.wv.gov/Documents/2020%20Executive%20Orders/EO%2050-20.pdf">https://governor.wv.gov/Documents/2020%20Executive%20Orders/EO%2050-20.pdf</a>                                                                                                                                                                                                                                   |
| Kentucky       | 7/9            | <a href="https://governor.ky.gov/attachments/20200904_Executive-Order_2020-750_Face-Coverings.pdf">https://governor.ky.gov/attachments/20200904_Executive-Order_2020-750_Face-Coverings.pdf</a>                                                                                                                                                                                                       |
| Louisiana      | 7/13           | <a href="https://gov.louisiana.gov/assets/Proclamations/2020/89-JBE-2020.pdf">https://gov.louisiana.gov/assets/Proclamations/2020/89-JBE-2020.pdf</a>                                                                                                                                                                                                                                                 |
| Montana        | 7/15           | <a href="https://covid19.mt.gov/Portals/223/Documents/Mask%20Directive%20FINAL.pdf?ver=2020-07-15-140109-633">https://covid19.mt.gov/Portals/223/Documents/Mask%20Directive%20FINAL.pdf?ver=2020-07-15-140109-633</a>                                                                                                                                                                                 |
| Alabama        | 7/16           | <a href="http://alabamapublichealth.gov/legal/assets/order-adph-cov-gatherings-072920.pdf">http://alabamapublichealth.gov/legal/assets/order-adph-cov-gatherings-072920.pdf</a>                                                                                                                                                                                                                       |
| Colorado       | 7/17           | <a href="https://www.colorado.gov/governor/sites/default/files/inline-files/D_2020_138_Mask_Order.pdf">https://www.colorado.gov/governor/sites/default/files/inline-files/D_2020_138_Mask_Order.pdf</a>                                                                                                                                                                                               |
| Arkansas       | 7/20           | <a href="https://governor.arkansas.gov/images/uploads/executiveOrders/EO_20-43.pdf">https://governor.arkansas.gov/images/uploads/executiveOrders/EO_20-43.pdf</a>                                                                                                                                                                                                                                     |

---

|                      |      |                                                                                                                                                                                                                                                                                                                                                                       |
|----------------------|------|-----------------------------------------------------------------------------------------------------------------------------------------------------------------------------------------------------------------------------------------------------------------------------------------------------------------------------------------------------------------------|
| District of Columbia | 7/22 | <a href="https://mayor.dc.gov/sites/default/files/dc/sites/mayormb/release_content/attachments/Mayor%27s%20Order%202020-080%20Wearing%20Masks%20in%20DC%20to%20Prevent%20COVID19.pdf">https://mayor.dc.gov/sites/default/files/dc/sites/mayormb/release_content/attachments/Mayor%27s%20Order%202020-080%20Wearing%20Masks%20in%20DC%20to%20Prevent%20COVID19.pdf</a> |
| Ohio                 | 7/23 | <a href="https://governor.ohio.gov/wps/portal/gov/governor/media/news-and-media/covid19-update-07222020">https://governor.ohio.gov/wps/portal/gov/governor/media/news-and-media/covid19-update-07222020</a>                                                                                                                                                           |
| Minnesota            | 7/25 | <a href="https://www.leg.mn.gov/archive/execorders/20-81.pdf">https://www.leg.mn.gov/archive/execorders/20-81.pdf</a>                                                                                                                                                                                                                                                 |
| Indiana              | 7/27 | <a href="https://www.in.gov/gov/files/Executive%20Order%2020-37%20Face%20Covering%20Requirement.pdf">https://www.in.gov/gov/files/Executive%20Order%2020-37%20Face%20Covering%20Requirement.pdf</a>                                                                                                                                                                   |
| Wisconsin            | 8/1  | <a href="https://evers.wi.gov/Documents/COVID19/EmO01-FaceCoverings.pdf">https://evers.wi.gov/Documents/COVID19/EmO01-FaceCoverings.pdf</a>                                                                                                                                                                                                                           |
| Vermont              | 8/1  | <a href="https://governor.vermont.gov/sites/scott/files/documents/ADDENDUM%20%20TO%20AMENDED%20AND%20RESTATED%20EXECUTIVE%20ORDER%20NO.%2001-20.pdf">https://governor.vermont.gov/sites/scott/files/documents/ADDENDUM%20%20TO%20AMENDED%20AND%20RESTATED%20EXECUTIVE%20ORDER%20NO.%2001-20.pdf</a>                                                                   |

---
