# Supplementary material for: #MaskOn! #MaskOff! Digital polarization of mask-wearing in the United States during COVID-19
Source: PubMed Central journal article supplement (PMC8081244; doi:10.1371/journal.pone.0250817), 2021-04-28
Supplement: pone.0250817.s006.pdf [file pone.0250817.s006.pdf]

**S3 Table.** News Headlines of high-profile events between March and August 2020

| <b>Date</b> | <b>Media</b>                       | <b>News Headline</b>                                                                                    | <b>Category</b>             |
|-------------|------------------------------------|---------------------------------------------------------------------------------------------------------|-----------------------------|
| 3/1         | Star Tribune<br>(Minneapolis, MN)  | 3M can't confirm Pence comments about making more masks                                                 | N/A                         |
| 3/4         | Situation Room (CNN)               | Pence: No need for Americans to buy masks                                                               | N/A                         |
| 3/11        | Washington Post                    | Face mask shortage propels CDC to loosen guidance for health-care workers                               | N/A                         |
| 3/19        | Situation Room (CNN)               | CDC recommends health care workers reuse masks in a crisis and use bandanas or scarves as a last resort | N/A                         |
| 3/21        | Washington Post                    | Front-line health workers push back against the CDC's new mask guidelines                               | N/A                         |
| 3/31        | Washington Post                    | CDC considers advising the public to wear face coverings                                                | N/A                         |
| 4/3         | CBS Evening News with Katie Couric | CDC recommends Americans should wear masks in public                                                    | CDC guidelines              |
| 4/3         | Situation Room (CNN)               | CDC recommends voluntary use of non-surgical masks                                                      | CDC guidelines              |
| 4/3         | Philadelphia Inquirer, The (PA)    | People should wear a cloth mask or facial covering when in public, new CDC guidance to say              | CDC guidelines              |
| 4/4         | Daily Mail                         | Trump: I call on every American to wear a face mask... except me.                                       | Mixed messaging             |
| 4/4         | New York Times                     | Undercutting C.D.C., President says he won't wear mask. (cover story)                                   | Violation of CDC guidelines |
| 4/4         | Washington Post                    | New face mask guidance comes after battle between White House and CDC                                   | CDC guidelines              |
| 4/5         | Situation Room (CNN)               | Trump on masks: I would wear one if I thought it was important                                          | Violation of CDC guidelines |
| 4/6         | Daily Mail                         | Vain Trump lets the mask slip.                                                                          | Violation of CDC guidelines |
| 4/14        | Washington Post                    | Without a mask, Trump shows us his true face                                                            | Violation of CDC guidelines |
| 4/28        | Situation Room (CNN)               | V.P. Pence tours mayo clinic without a mask despite policy requiring visitors to wear them              | Violation of CDC guidelines |
| 4/28        | Star Tribune<br>(Minneapolis, MN)  | No face mask for Mike Pence as he tours Mayo Clinic's COVID-19 testing labs                             | Violation of CDC guidelines |
| 4/28        | Washington Post                    | Pence visits Mayo Clinic without wearing a mask                                                         | Violation of CDC guidelines |

|      |                                    |                                                                                                                    |                                |
|------|------------------------------------|--------------------------------------------------------------------------------------------------------------------|--------------------------------|
| 4/29 | New York Times                     | Pence flouts face mask rule in Mayo Clinic visit                                                                   | Violation of CDC guidelines    |
| 4/30 | Star Tribune (Minneapolis, MN)     | Pence should have worn a mask during visit, and Mayo should have insisted                                          | Violation of CDC guidelines    |
| 5/1  | New York Times                     | Pence wears mask, a day after a visit without one                                                                  | Compliance with CDC guidelines |
| 5/2  | Washington Post                    | Pence's staff targets reporter over tweet on masks                                                                 | Violation of CDC guidelines    |
| 5/6  | Daily Mail                         | No mask, but Trump goes for goggles.                                                                               | Violation of CDC guidelines    |
| 5/11 | CBS Evening News with Katie Couric | White House directs staff to wear face masks in the West Wing                                                      | Compliance with CDC guidelines |
| 5/12 | Evening Standard                   | White House staff must wear masks ... except for 'invulnerable' Trump.                                             | Mixed messaging                |
| 5/12 | Daily Mail                         | White House to wear masks... except Trump.                                                                         | Mixed messaging                |
| 5/12 | Washington Post                    | White House mandates masks, but not for Trump                                                                      | Mixed messaging                |
| 5/21 | CBS Evening News with Katie Couric | President Trump visits Ford factory without face mask despite company policy                                       | Violation of CDC guidelines    |
| 5/21 | Situation Room (CNN)               | Trump continues refusal to wear mask in public                                                                     | Violation of CDC guidelines    |
| 5/21 | Washington Post                    | White House mandates masks, but not for Trump                                                                      | Mixed messaging                |
| 5/22 | Evening Standard                   | Trump faces flak for taking off face mask during public part of Ford tour                                          | Violation of CDC guidelines    |
| 5/22 | Washington Post                    | Trump skips mask in plant visit, defying Ford's request and Michigan law                                           | Violation of CDC guidelines    |
| 5/23 | Daily Mail                         | Trump won't wear mask in public.                                                                                   | Violation of CDC guidelines    |
| 5/23 | Daily Mail                         | At last, Trump wears mask (sort of).                                                                               | Compliance with CDC guidelines |
| 5/24 | CNN Reliable Sources               | Trump on his refusal to keep wearing mask at ford plant: I didn't want to give the press the pleasure of seeing it | Violation of CDC guidelines    |
| 5/26 | Evening Standard                   | Biden is mocked by Trump after he wears face mask at Memorial Day event.                                           | Violation of CDC guidelines    |
| 5/27 | CBS Evening News with Katie Couric | Trump mocks those wearing face masks, calling it "politically correct"                                             | Violation of CDC guidelines    |
| 5/30 | Dayton Daily News (OH)             | CDC publishes guide for schools on masks, cafeteria, buses, distancing                                             | CDC guidelines                 |
| 6/13 | Washington Post                    | CDC encourages masks for rallies                                                                                   | CDC guidelines                 |

|      |                                      |                                                                                         |                                |
|------|--------------------------------------|-----------------------------------------------------------------------------------------|--------------------------------|
| 6/13 | Wall Street Journal - Online Edition | CDC encourages wearing masks, other coronavirus precautions at gatherings.              | CDC guidelines                 |
| 6/28 | Situation Room (CNN)                 | Pence wears a mask during Texas visit as U.S. cases surge                               | Compliance with CDC guidelines |
| 6/28 | Situation Room (CNN)                 | Vice President Mike Pence urges everyone to wear a mask                                 | Compliance with CDC guidelines |
| 6/29 | Washington Post                      | Pence urges mask-wearing as cases soar                                                  | Compliance with CDC guidelines |
| 6/30 | Situation Room (CNN)                 | CDC pleads with young people to wear masks                                              | CDC guidelines                 |
| 7/1  | CBS Evening News with Katie Couric   | President Trump says "masks are good," but does not support making them mandatory       | Mixed messaging                |
| 7/1  | Situation Room (CNN)                 | Trump: "All for masks," Don't need to be mandatory                                      | Mixed messaging                |
| 7/2  | Evening Standard                     | Trump: I'm all for face masks. I look like Lone Ranger in mine.                         | Compliance with CDC guidelines |
| 7/10 | Situation Room (CNN)                 | Trump refuses to wear mask publicly in virus hot spot                                   | Violation of CDC guidelines    |
| 7/11 | Situation Room (CNN)                 | Trump wears face mask while visiting wounded U.S. troops                                | Compliance with CDC guidelines |
| 7/11 | Situation Room (CNN)                 | Trump wears face mask on visit to Walter Reed Medical Center                            | Compliance with CDC guidelines |
| 7/12 | Weekend Edition Sunday (NPR).        | Politics chat: President Trump changes stance on masks, wears one in public.            | Compliance with CDC guidelines |
| 7/12 | Good Morning America (ABC)           | President tours military hospital in mask.                                              | Compliance with CDC guidelines |
| 7/12 | New York Times                       | At a hospital, Trump finally dons a mask.                                               | Compliance with CDC guidelines |
| 7/13 | Good Morning America (ABC)           | Trump wears mask in public                                                              | Compliance with CDC guidelines |
| 7/13 | Washington Post                      | In about-face, Trump dons mask at Walter Reed                                           | Compliance with CDC guidelines |
| 7/17 | Situation Room (CNN)                 | Trump: Masks cause problems too                                                         | Violation of CDC guidelines    |
| 7/18 | Situation Room (CNN)                 | Trump cites freedom as reason to not mandate masks                                      | Violation of CDC guidelines    |
| 7/20 | FOX News                             | Trump tweets photo of himself wearing coronavirus mask: 'nobody more Patriotic than me' | Compliance with CDC guidelines |
| 7/20 | Situation Room (CNN)                 | Trump posts picture in mask                                                             | Compliance with CDC guidelines |

|      |                                    |                                                                                      |                                |
|------|------------------------------------|--------------------------------------------------------------------------------------|--------------------------------|
| 7/20 | CBS Evening News with Katie Couric | President Trump briefings to return as he calls wearing a mask patriotic             | Compliance with CDC guidelines |
| 7/21 | Situation Room (CNN)               | Trump says he would wear a mask, but did not last night at Trump Hotel               | Violation of CDC guidelines    |
| 7/31 | Situation Room (CNN)               | Trump in Florida as State sees deadliest day of pandemic, greets crowds without mask | Violation of CDC guidelines    |

---
